# Supplementary material for: Xrp1 is a transcription factor required for cell competition-driven elimination of loser cells
Source: PubMed Central journal article supplement (PMC6286310; doi:10.1038/s41598-018-36277-4), 2018-12-07
Supplement: 41598_2018_36277_MOESM1_ESM.pdf [file 41598_2018_36277_MOESM1_ESM.pdf]

**Supplementary file**

**Xrp1 is a transcription factor required for cell competition-driven elimination of loser cells**

**Authors**

Ludovic Baillon<sup>1</sup>, Federico Germani<sup>1\*</sup>, Claudia Rockel<sup>1</sup>, Jochen Hilchenbach<sup>1</sup> and Konrad Basler<sup>1\*</sup>

<sup>1</sup>Institute of Molecular Life Sciences, University of Zurich, Switzerland.

\*corresponding authors: federico.germani@uzh.ch, kb@imls.uzh.ch

## Supplementary figures

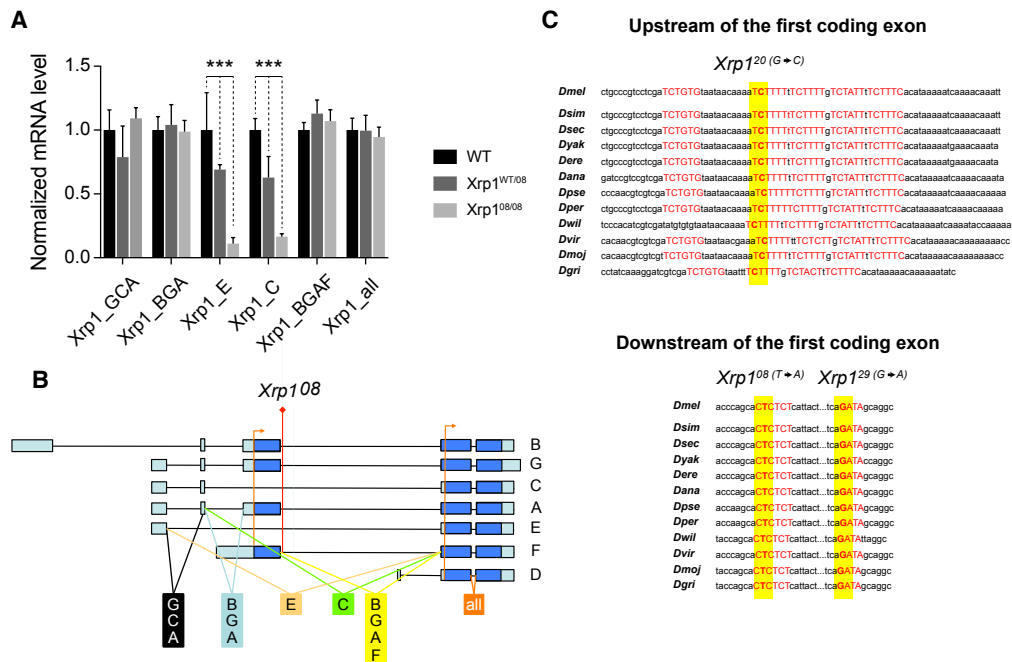

**Figure S1. EMS-retrieved intronic mutations are important for the splicing of *Xrp1*.** Representative qPCR reveals that *Xrp1*<sup>08</sup> leads to a constitutive downregulation of the transcripts E and C, but not of the transcripts GCA, BGA, BGAF and all (A). Schematic representation of the different *Xrp1* splicing isoforms and of the combinations of primers used for the qPCR (B). Alignment of *Drosophila Xrp1* sequences. The mutations retrieved from the EMS are indicated with the nucleotide substitutions. Conservation of these nucleotides is extended to intronic motifs, which are capitalized and depicted in red. *Xrp1*<sup>20</sup> disrupts the repetition of the conserved hexanucleotide pyrimidine motif TCTDTB. *Xrp1*<sup>08</sup> disrupts the conserved putative intronic splice enhancer (ISE) CTCTCT and *Xrp1*<sup>29</sup> disrupts a conserved GATA motif (C).

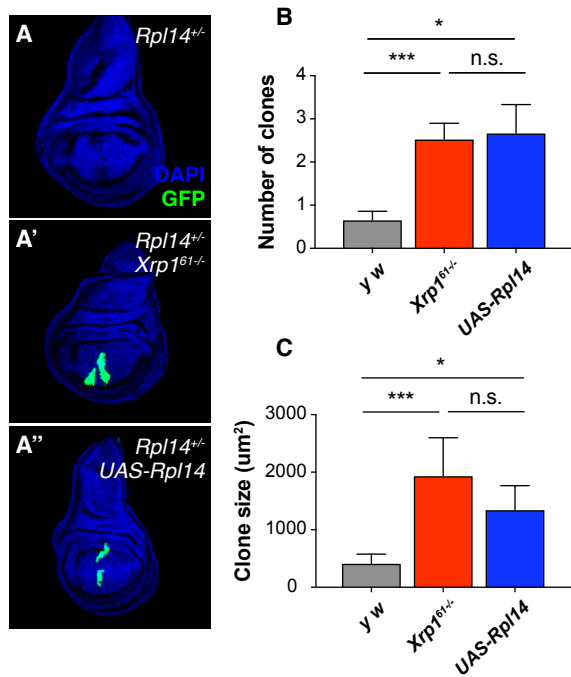

**Figure S2. Xrp1 is required for the elimination of *RpL14<sup>+/-</sup>* loser cells.** *RpL14<sup>+/-</sup>* loser cells are eliminated from the wing pouch (SalE driver) via cell competition (A). *Xrp1<sup>61-/-</sup>* rescues the elimination of *RpL14<sup>+/-</sup>* loser cells (A') similarly to a positive control rescue obtained via the overexpression of *RpL14* (A''). *Xrp1<sup>61-/-</sup>* (in red) rescues both the number (B) and the size (C) of *RpL14<sup>+/-</sup>* GFP<sup>+</sup> clones. \*\*\*P<0.001, \*\*P<0.01, n.s.=not significant. Kruskal-Wallis test. Bars represent SEM. n=19,19,8 (B and C).

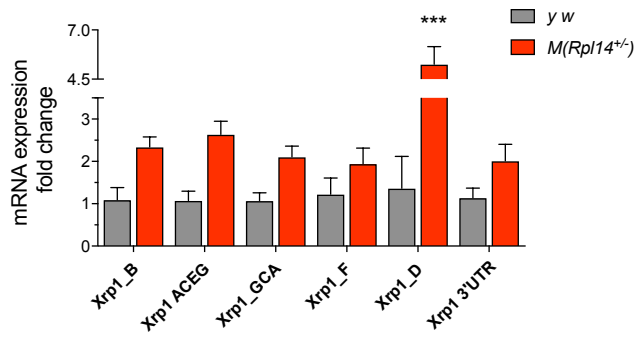

**Figure S3. Different Xrp1 isoforms are upregulated in *RpL14*<sup>+/-</sup> wing discs.** qPCR analysis shows that different isoforms of *Xrp1* are upregulated in *RpL14*<sup>+/-</sup> wing discs. t-test was applied. \*\*\*P<0.001.

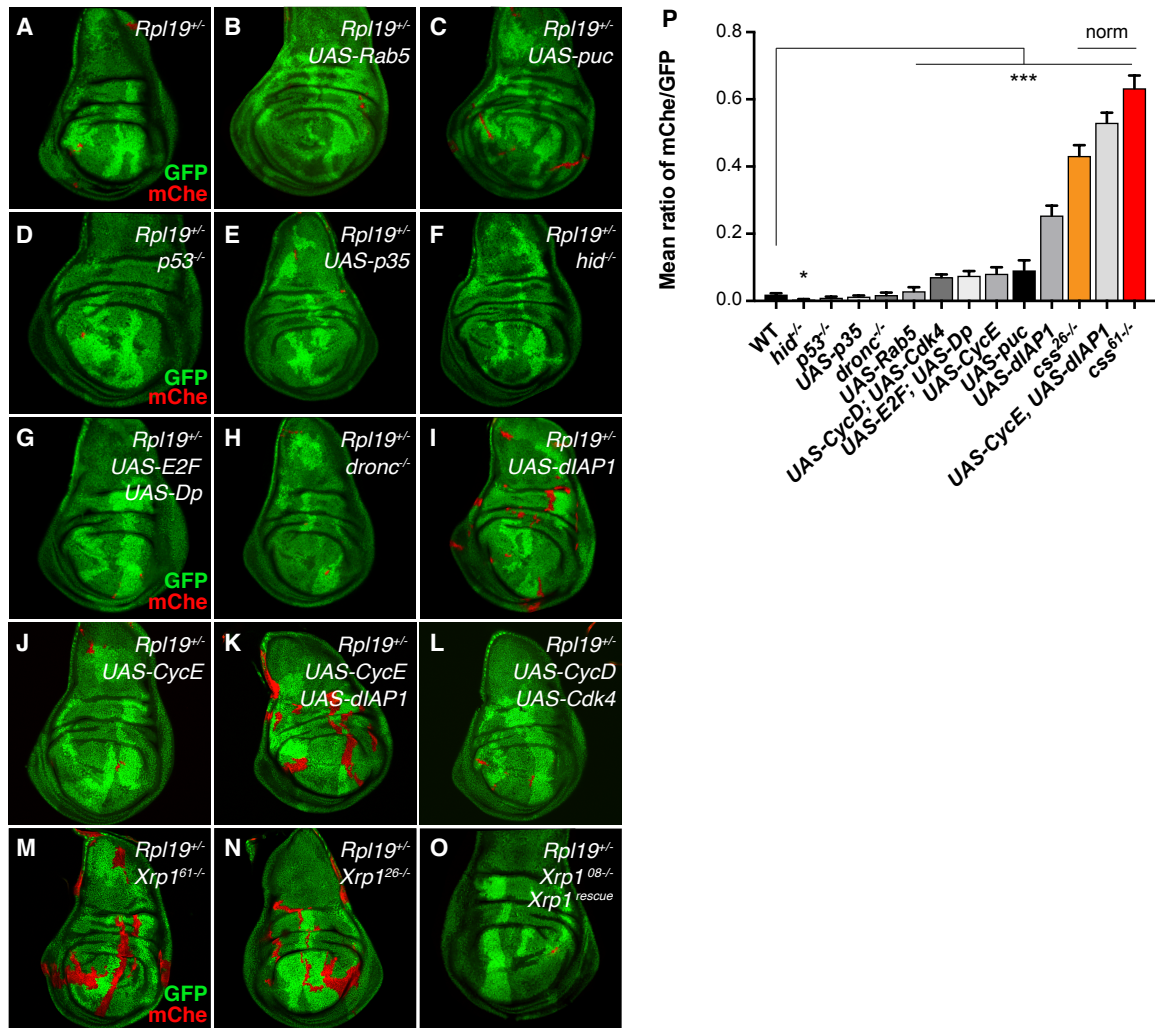

**Figure S4. *Xrp1* is a very strong suppressor of cell competition.** Representative discs displaying the suppressive potential of various genetic alterations. Loser clones are labeled with mCherry. Cell competition-driven elimination of *Rpl19*<sup>+/-</sup> loser cells (A) is not rescued with the overexpression of either *Rab5* (B) or *puc* (C), with the removal of *p53* (D), with the overexpression of *p35* (E), with the removal of *hid* (F), the concomitant expression of *E2F* and *Dp* (G) or the depletion of *dronc* (H). Partial rescue is obtained with the overexpression of *dIAP1* (I), no rescue is obtained with *CycE* overexpression (J). However, overexpression of *CycE* and *dIAP1* together potentiates the rescue efficacy of *dIAP1* overexpression alone (K). No rescue is obtained with double overexpression of *CycD* and *Cdk4* (L). Strong suppression of the elimination is obtained with various alleles of *Xrp1*, in the representative examples with *Xrp1*<sup>61</sup> (M) and *Xrp1*<sup>26</sup> (N). When a copy of *Xrp1* is reintroduced, loser cells are eliminated (O). This indicates that *Xrp1* is the strongest suppressor of cell competition and that the elimination of *minute* cells requires multiple inputs, particularly the induction of apoptosis and cell cycle arrest. (A-O) Quantification of the mean mCherry/GFP ratio. Genotypes are ranked according to their suppressive potential. \*\*\*P<0.001, \*P<0.05. Mann-Whitney test. Bars represent SEM. n=66,50,58,23,44,24,57,61,26,27,27,50,81,46 (in order of suppressive potential) (A to O). “norm” indicates the normality of the distribution as tested with the D’Agostino & Pearson normality test (P>0.05 indicates normality). *Xrp1*<sup>61</sup> (p=0.135), *UAS-CycE*;

*UAS-dIAP1* ( $p=0.125$ ) and *Xrpl<sup>26</sup>* ( $p=0.052$ ). For all the other genotypes the probability density functions are extremely right skewed with ( $P<0.0066$ ) (**P**).



protein family **(B)**. Phylogenetic reconstruction using PhyML and visualized with iTOL. Branches with a bootstrap value superior to 80% are marked with a grey round sign. Humans C/EBPs are highlighted in magenta and *Drosophila* C/EBPs homologues are highlighted in blue. Xrp1 position is marked with an asterisk **(C)**.



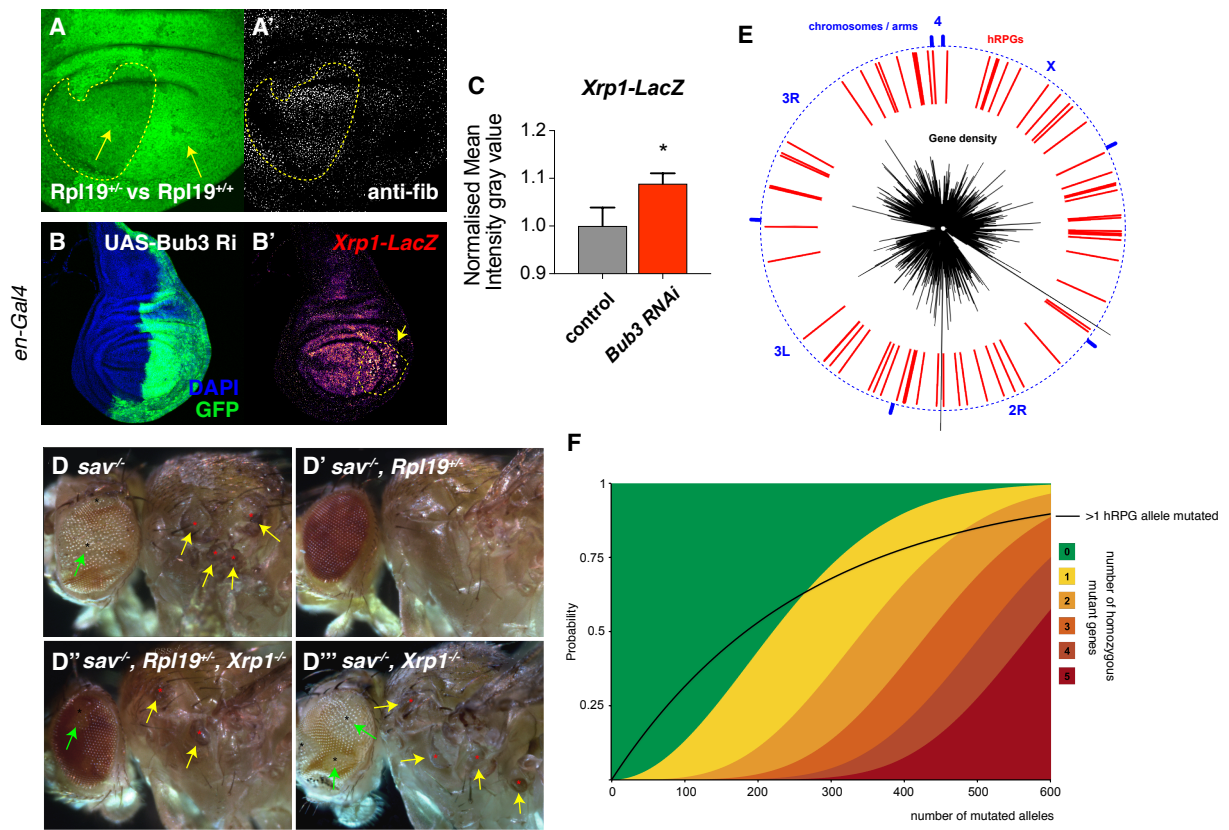

**Figure S6. Xrp1 is a caretaker of genomic instability.** *Rpl19<sup>+/+</sup>* compartment shows enlarged nucleoli as observed with an anti-Fibrillar staining (**A-A'**). Genomic instability obtained with the downregulation of Bub3 in the posterior compartment of the wing disc induces *Xrp1* expression, as revealed with a LacZ reporter (**B-B'**), quantified with the normalized mean intensity grey value (**C**). *Xrp1* exerts a tumor suppressive function. *salvador<sup>-/-</sup>* mutant flies develop tumors (**D**) and their generation can be rescued when animals are additionally heterozygous mutant for *RpL19* (**D'**). Additional abrogation of *Xrp1* function suppresses the anti-tumorigenic effect of *RpL19* mutations (**D''**). *sav<sup>-/-</sup>, Xrp1<sup>-/-</sup>* flies also develop tumors (**D'''**). Wide distribution of hRPGs in the *Drosophila* genome (**E**). Monte-carlo simulation shows that the probability that both alleles of a random gene are mutated is lower than the probability of having 1 hRPG allele mutated when the number of mutated alleles is not extremely elevated (**F**).

## SM file 1 – Python code for Monte-Carlo simulation

@author: tinria

```
"""
import numpy.random as rd
import numpy as np

simno=1000#1000 #number of simulations, the higher this number, the more precise the probability
maxk=600#600 #maximum number of mutations to be analyzed
n=35016#35016 #number of different alleles
max_pairs=5 #the probability is given to get 0 pairs, 1 pairs, 2 pairs ... max_pairs pairs
probs_tot=""#in this string all results are saved; per entry of the list: first
#number: number of mutations simulated, second number: probability that no
#pair is hit, third number: probability that one pair is hit, etc
print 'k, from 0 pairs until '+str(max_pairs)+' pairs'
for k in range(maxk):
    pairs=np.zeros(simno)
    pairs2=np.zeros(simno)
    for i in range(simno):
        genes=np.zeros(k)
        alleles=np.zeros(k)
        genes=rd.randint(0,n//2,k)
        alleles=rd.randint(0,2,k)
        freq_gene_hit=np.bincount(genes)
        genes_hit_at_least_twice=np.where(freq_gene_hit>=2)[0]
        for gene in genes_hit_at_least_twice:
            pos=np.where(genes==gene)[0]
            num=5
            change=0
            for l in range(len(pos)):
                if alleles[pos[l]]!=num:
                    change+=1
                    num=alleles[pos[l]]
            if change>=2:
                pairs[i]+=1

    probs=np.zeros(max_pairs+1)
    print str(k),
    for i in range(max_pairs+1):
        probs[i]=len(np.where(pairs==i)[0])/simno
    print str(probs[i]),
    probs_tot+=str(k)+' mutations:'+str(probs[:]).strip(' ').strip(',')+'\n'
    print
print probs_tot
```
